# Supplementary material for: Fibronectin contributes to notochord intercalation in the invertebrate chordate, Ciona intestinalis
Source: PubMed Central journal article supplement (PMC5006582; doi:10.1186/s13227-016-0056-4), 2016-08-31

**A**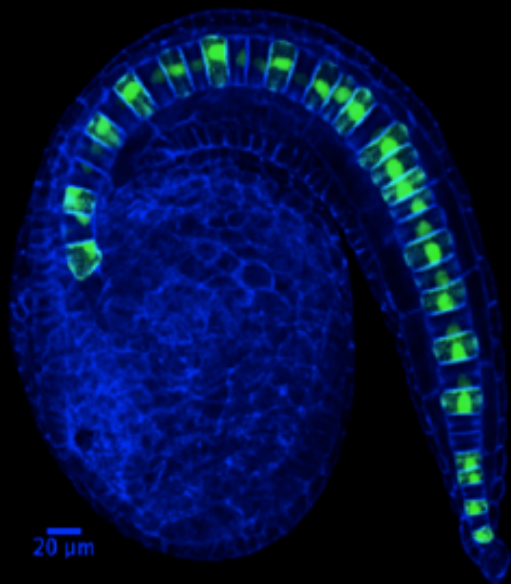**B**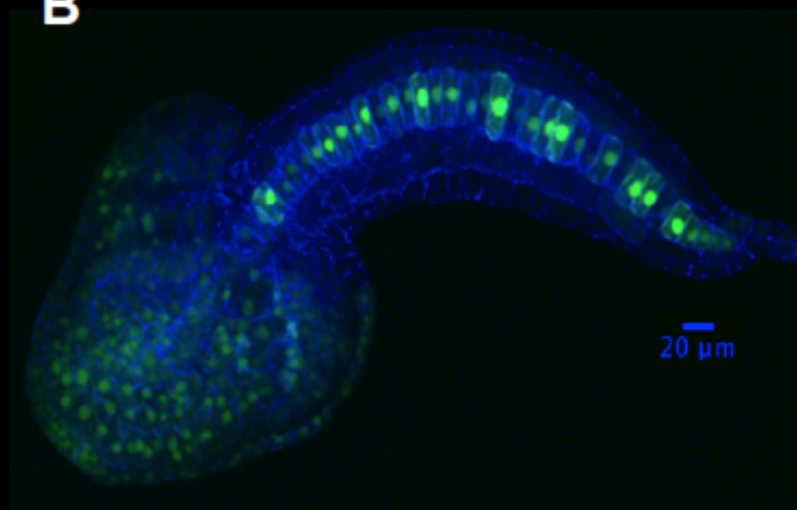**C**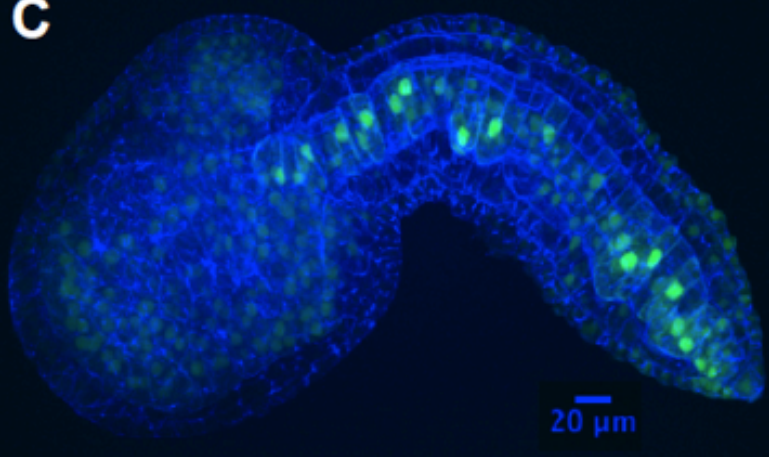**D**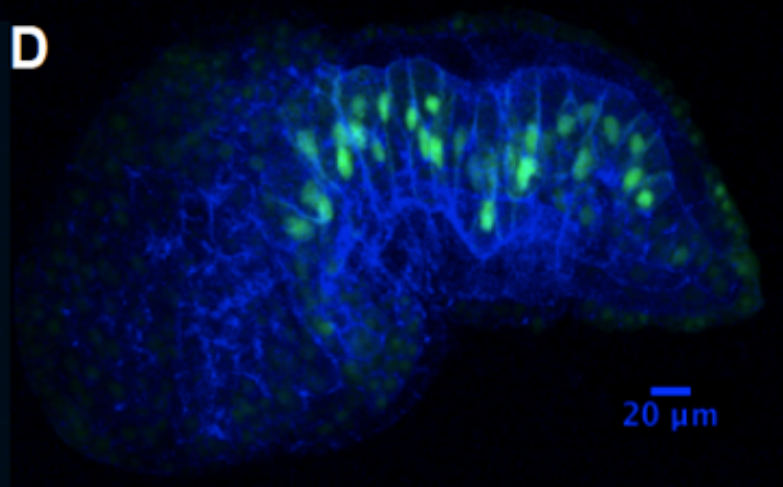**E**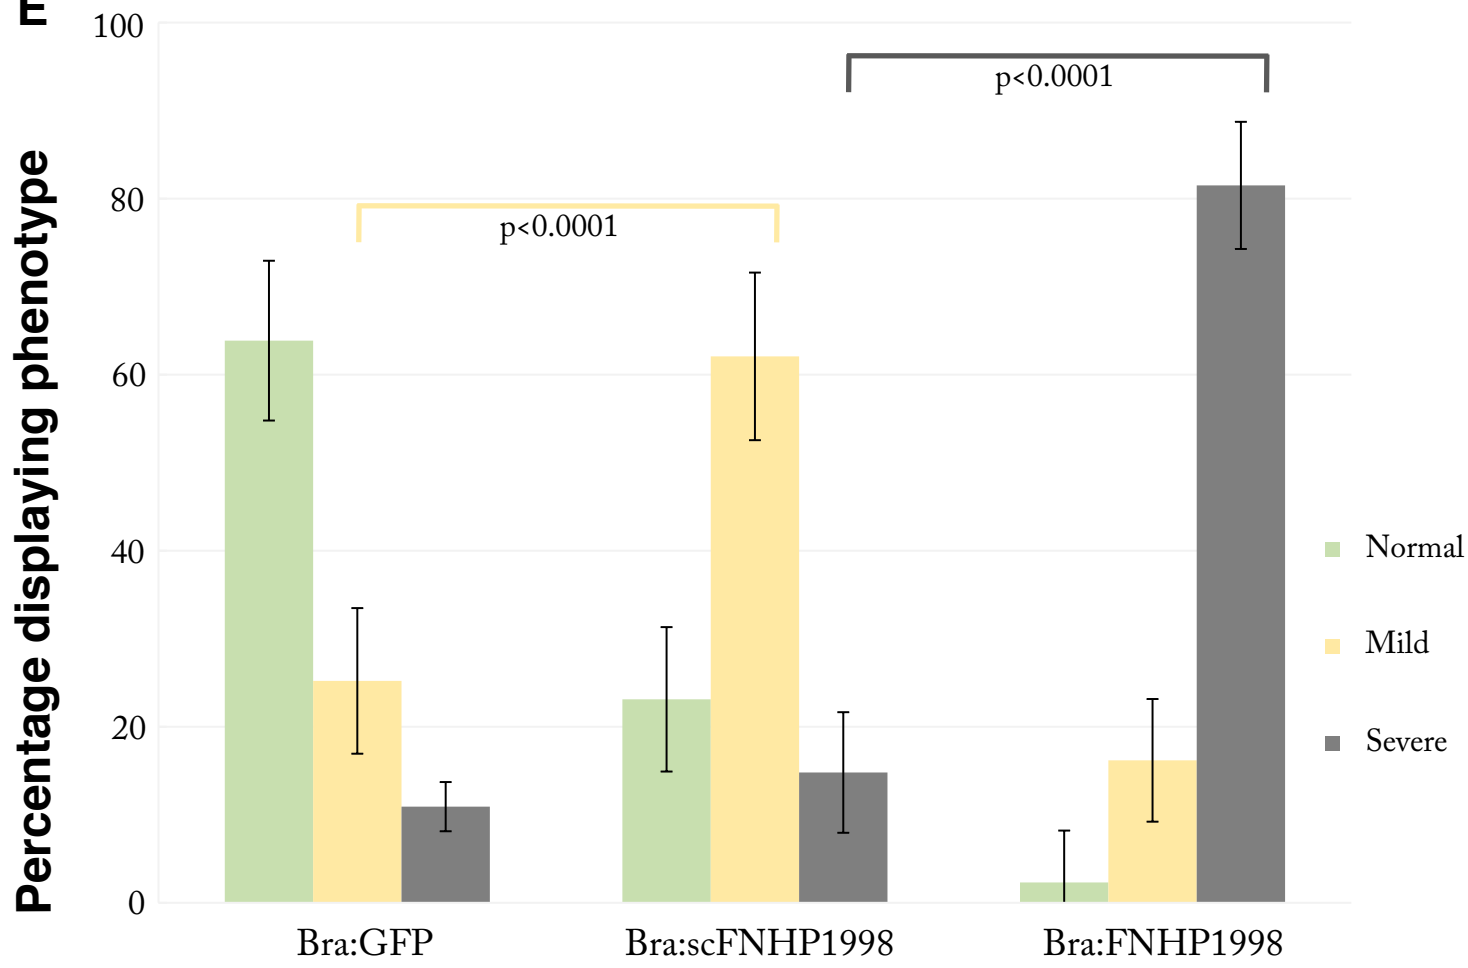

Supplement: 13227_2016_56_MOESM6_ESM.pdf [file 13227_2016_56_MOESM6_ESM.pdf]
